1 **Title: Quantitative assessment of NCLDV–host interactions**  
2 **predicted by co-occurrence analyses**

3  
4 **Running title: NCLDV–host prediction based on co-occurrence**  
5 **analysis**

6  
7 Lingjie Meng<sup>a</sup>, Hisashi Endo<sup>a</sup>, Romain Blanc-Mathieu<sup>a,b</sup>, Samuel Chaffron<sup>c,d</sup>, Rodrigo  
8 Hernández-Velázquez<sup>a,c</sup>, Hiroto Kaneko<sup>a</sup>, Hiroyuki Ogata<sup>a,#</sup>

9  
10 **Affiliations:**

- 11 a. Bioinformatics Center, Institute for Chemical Research, Kyoto University, Gokasho, Uji,  
12 611-0011, Japan  
13 b. Laboratoire de Physiologie Cellulaire & Végétale, CEA, Univ. Grenoble Alpes, CNRS,  
14 INRA, IRIG, Grenoble, France  
15 c. Université de Nantes, CNRS UMR 6004, LS2N, F-44000 Nantes, France  
16 d. Research Federation (FR2022) Tara Océan GO-SEE, Paris, France  
17 e. Max Planck Institute for Marine Microbiology, Celsiusstraße 1, Bremen, Germany

18  
19 **#Corresponding author:**

20 Hiroyuki Ogata (E-mail: [ogata@kuicr.kyoto-u.ac.jp](mailto:ogata@kuicr.kyoto-u.ac.jp), Phone: +81-774-38-3270)

21  
22 **Abstract**

23 Nucleocytoplasmic DNA viruses (NCLDVs) are highly diverse and abundant in  
24 marine environments. However, knowledge of their hosts is limited because only a few  
25 NCLDVs have been isolated so far. Taking advantage of the recent large-scale marine  
26 metagenomics census, *in silico* host prediction approaches are expected to fill the gap and  
27 further expand our knowledge of virus–host relationships for unknown NCLDVs. In this  
28 study, we built co-occurrence networks of NCLDVs and eukaryotic taxa to predict virus–host  
29 interactions using *Tara* Oceans sequencing data. Using the positive likelihood ratio to assess  
30 the performance of host prediction for NCLDVs, we benchmarked several co-occurrence  
31 approaches and demonstrated an increase in the odds ratio of predicting true positive  
32 relationships four-fold compared with random host predictions. To further refine host  
33 predictions from high-dimensional co-occurrence networks, we developed a phylogeny-  
34 informed filtering method, Taxon Interaction Mapper, and showed it further improved the

35 prediction performance by twelve-fold. Finally, we inferred virophage – NCLDV networks to  
36 corroborate that co-occurrence approaches are effective for predicting interacting partners of  
37 NCLDVs in marine environments.

38

## 39 **Importance**

40 NCLDVs can infect a wide range of eukaryotes although their life cycle is less  
41 dependent on hosts compared with other viruses. However, our understanding of NCLDV–  
42 host systems is highly limited because few of these viruses have been isolated so far. Co-  
43 occurrence information has been assumed to be useful to predict virus–host interactions. In  
44 this study, we quantitatively show the effectiveness of co-occurrence inference for NCLDV  
45 host prediction. We also improve the prediction performance with a phylogeny-guided  
46 method, which leads to a concise list of candidate host lineages for three NCLDV families.  
47 Our results underpin the usage of co-occurrence approach for metagenomic exploration of the  
48 ecology of this diverse group of viruses.

49

## 50 **Introduction**

51 Nucleocytoplasmic large DNA viruses (NCLDVs) represent a group of double-  
52 stranded DNA viruses that belong to the viral phylum *Nucleocytoviricota* ([Virus Taxonomy:  
53 2019 Release](#)), which was previously referred to as Megavirales (1, 2). NCLDVs usually  
54 possess diverse gene repertoires (74 to more than 2,000 proteins), large genomes (45 kb to  
55 2.5 Mb), and outsized virions (80 nm to 1.5  $\mu$ m) (3–5). NCLDVs have high functional  
56 autonomy and encode components of replication, transcription, and translation systems (3).  
57 Recently, a virus that belongs to a new family of NCLDVs called “Medusaviridae” was  
58 found to encode five types of histones (6). The existence of metabolically active viral  
59 factories and infectious virophages also indicates that the life cycle of NCLDVs is less  
60 dependent on host cells than other viruses (7, 8). To further understand what makes these  
61 giant viruses more independent than other viruses, a first crucial step is to identify their hosts  
62 — “Who infects whom?”.

63 NCLDVs are known to infect a broad range of eukaryotes, from unicellular  
64 eukaryotes and macroalgae to animals (9). Amoebae are frequently used hosts in co-culture  
65 to isolate large NCLDVs (10). However, there is growing evidence, especially in marine  
66 systems, that NCLDVs can infect many phytoplankton groups, such as Pelagophyceae,  
67 Mamiellophyceae, Dinophyceae, and Haptophyte (11–13). Several other non-photosynthetic  
68 eukaryotic lineages, such as Bicoecea and Choanoflagellata, were also reported as

69 experimentally identified NCLDV hosts in marine environments (14, 15). Small to large  
70 marine organisms, including invertebrates and vertebrates, are infected by viruses that belong  
71 to the NCLDV family *Iridoviridae* (16, 17). Together these studies indicate ubiquitous  
72 infectious relationships between NCLDVs and a wide range of marine eukaryotes. However,  
73 our understanding of NCLDV–host systems is very limited because few viruses have been  
74 isolated so far.

75         The number of viruses and hosts isolated in the laboratory represents a very small  
76 fraction of existing interactions in the ocean. Indeed, NCLDVs have been found to be highly  
77 diverse and abundant based on omics data (18, 19). In only a few liters of coastal seawater,  
78 more than 5,000 *Mimiviridae* species were detected; by comparison, only 20 *Mimiviridae*  
79 with known hosts have been well investigated (20). Global marine metagenomic data have  
80 revealed that the richness and phylogenetic diversity of NCLDVs are even higher than those  
81 of an entire prokaryotic domain (21). From biogeographical evidence, it is clear that these  
82 viruses are prevalent in the marine environment but have a heterogeneous community  
83 structure across sizes, depths, and biomes (22). Marine metatranscriptomic data have also  
84 shown that NCLDVs are active everywhere in sunlit oceans and may infect hosts from small  
85 piconanoplankton (0.8–5  $\mu\text{m}$ ) to large mesoplankton (180–2000  $\mu\text{m}$ ) (23).

86         Previous studies also demonstrated that NCLDVs have the potential to infect a greater  
87 diversity of hosts than known to date through gene transfer analyses (24, 25). NCLDVs might  
88 have started coevolving with eukaryotes even before the last eukaryotic common ancestor  
89 (LECA) (26). A recent study supported this hypothesis by showing that some NCLDVs  
90 encode viractins (actin-related genes in viruses), which could have been acquired from proto-  
91 eukaryotes and possibly reintroduced in the pre-LECA eukaryotic lineage (27). Together,  
92 these findings underline a lack of knowledge about NCLDV biology and host diversity.  
93 Therefore, more effort is needed to identify hosts to elucidate the poorly known virus–host  
94 relationships and the largely unknown NCLDV world.

95         Substantial effort has been made to reveal interactions between NCLDVs and their  
96 putative hosts. Apart from the co-culture method, other alternative methods, including high-  
97 throughput cell sorting, are also being used (10, 15). Metagenomics, which is particularly  
98 useful to assess a large fraction of ecosystem diversity, has been increasingly used to  
99 investigate NCLDVs host range. Comparative genomics analyses, such as identification of  
100 horizontal gene transfer (HGT) predictions, have also performed well for NCLDV host  
101 prediction (24, 25).

102 Abundance-based co-occurrence analyses have been used for host prediction and are  
103 supposed to be effective because viruses can only thrive in an environment where their hosts  
104 exist (18, 28). In addition to virus–host relationships, co-occurrence networks have been used  
105 to predict the association between NCLDV and their “parasites” (virophages) (29).  
106 However, the co-occurrence-based prediction is also controversial for viral host prediction  
107 since the abundance dynamics of viruses and their hosts (e.g., *Emiliana huxleyi* and  
108 *Heterosigma akashiwo* viruses) are sometimes not concordant (30, 31). Usually, validation  
109 with known virus–host relationships or corroboration with genomic evidence (e.g., HGT) is  
110 used to assess network-based predictions (18, 28). However, the effectiveness of previous  
111 and novel co-occurrence network methods has never been quantitatively tested for NCLDV  
112 host prediction. The current lack of quantitative assessment hinders the widespread use of  
113 this approach. Therefore, dedicated methods are needed to test the accuracy of NCLDV host  
114 prediction with co-occurrence networks and to improve the performance of co-occurrence-  
115 based predictions.

116 The *Tara* Oceans expedition is a global-scale survey on marine ecosystems that  
117 expands our knowledge of microbial diversity, organismal interactions, and ecological  
118 drivers of community structure (32). The present study used *Tara* Oceans metagenomic and  
119 metabarcoding datasets to predict virus–host relationships between NCLDVs and eukaryotes  
120 by constructing co-occurrence networks using different methods. To quantitatively assess the  
121 performance of network-based host prediction, we employed the positive likelihood ratio  
122 (LR+) using reference data for known NCLDV–host relationships. We developed a  
123 phylogeny-based enrichment analysis approach, Taxon Interaction Mapper (TIM), to enhance  
124 the performance in detecting positive signals in the intricate inferred networks. TIM has  
125 previously been used in host predictions for DNA and RNA viruses (33), but without a  
126 quantitative assessment on its effectiveness. In this study, we assessed the performance of  
127 TIM as a filter of co-occurrence networks. We examined NCLDV–virophage networks,  
128 which further justify the use of co-occurrence and filtering approaches to identify NCLDV  
129 interaction partners.

130

131

## 132 **Results**

### 133 **NCLDV–eukaryote co-occurrence networks**

134 From five datasets that corresponded to five size fractions (Fig. S1), we generated five  
135 co-occurrence networks on a global scale (Fig. 1, S2A). Altogether, these networks were

136 composed of 20,148 V9 and 5,234 *polB* OTUs (nodes) and 47,978 *polB*-V9 associations  
137 (edges). Out of these associations, 47,296 had positive weights, and 682 had negative weights  
138 (Fig. 2A). The associations that involved the family *Mimiviridae* were numerically dominant  
139 ( $n = 36,830$ ) among the different NCLDV families. The second largest family was  
140 *Phycodnaviridae*, with 5,521 edges involving eukaryotes. No other family had more than 2,000  
141 associations with eukaryotes. *Marseilleviridae*, forming the least associations in the networks,  
142 had 132 edges with eukaryotes. Taxonomic annotation of eukaryotic OTUs indicated that  
143 Alveolata, Opisthokonta, Rhizaria, and Stramenopiles were the major four eukaryotic groups  
144 connected to NCLDVs (with 21,167, 9,179, 6,521, and 5,327 edges, respectively). Three of  
145 these eukaryotic groups belong to the SAR supergroup (i.e., Stramenopiles, Alveolata, and  
146 Rhizaria), which represented 68.81% of the total associations. Regarding the pairs between  
147 viral families and eukaryotic lineages, *Mimiviridae* and Alveolata showed the largest number  
148 of edges ( $n = 16,548$ ). Besides NCLDV-eukaryote associations, we detected 57,495 *polB-polB*  
149 associations and 234,448 V9-V9 associations (Fig. S2B). We also included environmental  
150 parameters in the network inference and identified 25 pairs of associations between  
151 environmental parameters and *polB* OTUs (Table S1).

152 The number of NCLDV-eukaryote associations generally decreased with enlarging  
153 size fraction (Fig. S2A). The largest number of *polB*-V9 associations were found in the 0.8-  
154 5- $\mu\text{m}$  fraction ( $n = 10,647$ ). Correspondingly, the eukaryotic community in 0.8-5- $\mu\text{m}$  fraction  
155 had the greatest diversity (Fig. S3). However, the 0.8-inf- $\mu\text{m}$  size fraction network was the  
156 largest ( $n = 10,477$ ) for edges with positive weights. With the annotation of major lineages,  
157 the eukaryotic community compositions in the networks varied across different size fractions  
158 (Fig. 2B). In the smallest size fraction (0.8-5  $\mu\text{m}$ ) and the large range size fraction (0.8-inf  
159  $\mu\text{m}$ ), Marine Alveolate Group II was the eukaryotic lineage with the largest number of  
160 associations with NCLDVs (21.39% and 19.98%, respectively). Dinophyceae was the second  
161 largest group connected to NCLDVs in these two size fractions and showed the largest  
162 number of connections with NCLDVs in the 5-20- $\mu\text{m}$  size fraction network (22.22% of total  
163 interactions). The viral associations with Metazoa and Collodaria increased with increasing  
164 size fractions. In the largest 180-2000- $\mu\text{m}$  size fraction network, Metazoa contributed  
165 39.31% of the total *polB*-V9 edges.

166 We calculated the degree of nodes (number of connected edges) for each NCLDV  
167 *polB* OTU (Fig. 3A, B). Naturally, the average degree of positive associations per *polB* was  
168 higher than negative edges in all size fractions and decreased along with increasing size  
169 fractions (2.69, 2.40, 2.25, and 2.10 from 0.8-5  $\mu\text{m}$  to 180-2000  $\mu\text{m}$ , and 2.76 for 0.8-inf).

170 Most of the *polB* nodes had more than one positive association (Fig. 3A). Together with the  
171 taxonomic annotation of nodes, *polB*-V9 associations in the networks generated with the  
172 *Tara* Oceans data revealed their high dimensionality and complexity.

173

#### 174 **Network validation**

175 We quantitatively assessed the performance of predicting *polB*-V9 associations using  
176 the positive likelihood ratio (LR+) (Fig. 1). By defining groups of metagenomic PolBs as  
177 described in the Materials and Methods, 932 OTUs were recruited in the validation, and these  
178 sequences contributed 6191 *polB*-V9 associations in the FlashWeave networks (Fig. S4). To  
179 obtain an overall performance, we assessed the pooled associations (by removing  
180 redundancy) from the five co-occurrence networks. LR+ was separately calculated for edges  
181 with positive and negative weights because they can represent different infectious patterns.  
182 As shown in Fig. 4A, the LR+ of host prediction for positive associations was higher than 1  
183 (LR+ = 1 indicates no change in the likelihood of the condition). The LR+ generally  
184 increased with the cut-off for FlashWeave weights, which indicated that condition positive  
185 cases are enriched in the edges with higher weights. This result demonstrated that the co-  
186 occurrence-based host prediction of NCLDV's outperformed random prediction (i.e., random  
187 inference of virus-host pairs). In high-weight regions: 1) weight > 0.6, the LR+ of  
188 associations was higher than 10; 2) weight > 0.4, the LR+ was roughly higher than 4.  
189 Nonetheless, the false discovery rate (FDR) was high (Fig. S5A), which indicated that the  
190 predictions contained numerous virus-host edges that were not considered condition positive.  
191 FDR was 91.67% and 96.34% when weight is greater than 0.6 and 0.4, respectively. An  
192 assessment of the host prediction for negative weight associations was also carried out. There  
193 were no known NCLDV-host pairs found in the negative networks (Fig. S5B). The analysis  
194 of the remaining part of our study was thus conducted for positive associations.

195 Comparing the performance between different size fractions indicated that the  
196 networks of small size fractions (including the 0.8-inf- $\mu$ m size fraction) performed better in  
197 predicting the NCLDV-host relationships (Fig. 4B, S6). The 0.8-inf- $\mu$ m size fraction had the  
198 highest average LR+ out of the five size fractions (LR+ = 4.97). The LR+ of small size  
199 fractions was generally higher than that of large size fractions, but there were exceptions  
200 between 180-2000 and 20-180  $\mu$ m. The LR+ of the associations in the 0.8-inf- $\mu$ m, 0.8-5- $\mu$ m  
201 and 5-20- $\mu$ m was greater than 1. Different from the average results, when the weight is  
202 greater than 0.8, the associations of 5-20- $\mu$ m size fraction had the best performance in terms  
203 of both LR+ and FDR (Fig. S6 A, B).



204 We also compared abundance filtration strategies using Flashweave-S (sensitive  
205 model) and FlashWeave-HE (heterogeneous model) but did not find a consistent pattern in  
206 prediction performance (Fig. S7). The networks from the Q1 filtration strategy performed  
207 best using Flashweave-S, but Q1 (lower quartile) filtration was not better than Q2 (middle  
208 quartile) for Flashweave-HE inferred networks. Flashweave-S had a better performance than  
209 HE model with any filtration strategy. Finally, we compared the performance of networks  
210 inferred by all three methods: FlashWeave-S, FastSpar and Spearman. Three methods  
211 generated a comparable number of positive associations, but FlashWeave-S made the largest  
212 number of true positive predictions (Fig. S8A). Noteworthy, the LR+ of these three methods  
213 were all larger than 1, however, FlashWeave-S and Spearman performed better than FastSpar  
214 (Fig. S8B).

215

### 216 **Assessment of host prediction improvement**

217 Then we used the newly developed phylogeny-guided host prediction tool, TIM, to  
218 filter *polB*–V9 associations, which is based on the assumption that evolutionarily related  
219 viruses tend to infect evolutionarily related hosts (see Materials and Methods). We identified  
220 24 eukaryotic taxonomic groups specifically associated with NCLDV s (Fig. S9). To compare  
221 the performance of the TIM results with the above raw FlashWeave results, we converted the  
222 three primary eukaryotic taxonomic ranks to their associated major lineages (Table S2), and  
223 the associations were plotted as a network (Fig. 5A). This network showed that three out of  
224 nine NCLDV families (*Mimiviridae*, *Phycodnaviridae*, and *Iridoviridae*) had enriched  
225 connections in specific eukaryotic lineages. Among the network edges, known virus–host  
226 pairs were found, such as Haptophyta–*Mimiviridae*, Mamiellophyceae–*Phycodnaviridae*, and  
227 Metazoa–*Iridoviridae*. The associations in the TIM-filtered results showed a sharp  
228 improvement in performance from the original result with and without an edge weight cut-  
229 off. The average LR+ of TIM-enriched associations was 42.22, which was higher than the  
230 raw FlashWeave associations without a weight cut-off (3.43), with a weight cut-off of 0.4  
231 (5.20), and with a cut-off at 0.668 (14.23) (Fig. 5B, S9A). The FDR dropped from 0.97 (no  
232 cut-off) and 0.95 (weight cut-off of 0.4) to 0.74 (Fig. 5C).

233 From the network, diverse putative hosts (13 lineages) emerged for *Mimiviridae*,  
234 including algae, protozoans, and metazoans. Metazoa had the most enriched nodes connected  
235 to *Mimiviridae*; additionally, MAST-3,12, Cryptophyta, Foraminifera, and Ciliophora had  
236 strong relationships with *Mimiviridae*. For *Phycodnaviridae*, there were six eukaryotic  
237 lineages retained after TIM filtration. Among these, Bacillariophyta, “other filosan (part of

238 filosan Cercozoa)", and Mamiellophyceae had comparatively strong associations. Moreover,  
239 Rhodophyta, Ciliophora, and Dictyochophyceae had links to both *Mimiviridae* and  
240 *Phycodnaviridae*. There was also a connection between *Iridoviridae* and Metazoa.

241

## 242 **Associations between virophages and NCLDVs**

243 Using 6,818 NCLDV *polB* OTUs and 195 virophage major capsid proteins (MCPs),  
244 we identified 535 FlashWeave associations (196 and 339 for pico- and femto-size fractions,  
245 respectively) (Fig. 6A). Most of the associations had positive weights ( $n = 490$ ), whereas  
246 some had negative weights ( $n = 45$ ). The average number of associations per virophage MCP  
247 was different in two size fractions: 3.2 in femto- and 5.6 in pico-size fractions. The network  
248 revealed that *Mimiviridae* had the largest number of virophage associations in both size  
249 fractions. We also detected 84 positive associations between virophages and  
250 *Phycodnaviridae*.

251 The phylogenetic tree defined three main virophage clades, and they were all found to  
252 have many connections to NCLDVs. To investigate significant relationships, Fisher's exact  
253 test was performed between virophage clades and NCLDV families. Families other than  
254 *Phycodnaviridae* and *Mimiviridae* did not show significant associations. Therefore, we made  
255 a group, "Other NCLDVs," to include all families except *Phycodnaviridae* and *Mimiviridae*.  
256 First, we only used FlashWeave results with a weight  $> 0.4$ , as previous results showed that a  
257 FlashWeave weight of 0.4 is a suitable cut-off that produced moderate performance (Fig.  
258 3A). From the femto-size fraction network, we found two significantly enriched connections  
259 (Fig. 6B): one was between virophage group C and *Mimiviridae* ( $p = 0.0022$ ) and the other  
260 was between group A and "Other NCLDVs" ( $p = 0.0439$ ). Another significantly enriched  
261 relationship between virophage group B and *Phycodnaviridae* ( $p = 0.0410$ ) was found in  
262 pico-size fractions when we used all associations without edge weight cut-off.

263 Finally, we examined HGTs of virophage MCPs in NCLDV genomes. We found two  
264 HGTs of virophage MCPs; both showed links between clade A and *Iridoviridae* (Table S3).  
265 This result was consistent with the Fisher's exact test result, which revealed a connection  
266 between virophage clade A and "Other NCLDVs" including *Iridoviridae*.

267

## 268 **Discussion**

269 NCLDVs can infect a wide range of eukaryotes, from unicellular to multicellular  
270 organisms (34). However, we are still far from a comprehensive knowledge of their hosts  
271 because few have been isolated so far. Therefore, better host prediction algorithms are needed



272 to understand the ecological functions and evolutionary significance of NCLDV. To make  
273 these predictions, we constructed global ocean co-occurrence networks based on the marine  
274 metagenome and metabarcoding datasets from 85 stations of the *Tara* Oceans expedition,  
275 which cover all major oceanic provinces across an extensive latitudinal gradient from pole to  
276 pole. The edges (associations) between *polB* and V9 nodes (OTUs) in the networks were  
277 generated using FlashWeave. The networks were particularly dense (Fig. 2A, S2A), thus  
278 suggesting that NCLDVs interact with numerous eukaryotes in the ocean. This was expected  
279 given the high abundance and diversity of NCLDVs in marine environments (18, 21) and the  
280 identification of HGT between these viruses and diverse eukaryotic lineages (24). The  
281 networks were dominated by the *Mimiviridae* nodes, which is consistent with previous  
282 reports that *Mimiviridae* is the most abundant and has the widest array of transcribed genes  
283 out of NCLDV families in marine environments (22, 23). *Mimiviridae* was known to infect  
284 amoebae, algae, and stramenopiles (3). In our study, these three eukaryotic groups were all  
285 found to have numerous associations with *Mimiviridae*. *Phycodnaviridae* has been known to  
286 infect many species of aquatic organisms, such as *Emiliana huxleyi* (Haptophyta),  
287 *Ectocarpus siliculosus* (Phaeophyceae), *Chlorella heliozoae* (Trebouxiophyceae), and  
288 *Ostreococcus tauri* (Mamiellophyceae) (35–37). Correspondingly, plenty of associations of  
289 *Phycodnaviridae* were found in the co-occurrence networks. For the eukaryotic nodes, all  
290 high taxonomic rank groups, including the SAR supergroup (i.e., Stramenopiles, Alveolata,  
291 Rhizaria), Opisthokonta, Archaeplastida, Amoebozoa, Excavata, and other eukaryotes, have  
292 associations with NCLDVs. Among these groups, the SAR supergroup contributed the most  
293 (~68%) *polB*–V9 associations. However, this is still lower than in other microbial co-  
294 occurrence analyses; for example, a previous study showed SAR supergroup dominated  
295 ~92% of the total aquatic microbial associations (38). A substantial proportion (~32%) of  
296 NCLDV–eukaryote interactions were from non-SAR groups, which covered the known  
297 NCLDV host range, such as Archaeplastida and Haptophyta.

298         However, it is difficult to accurately predict NCLDV hosts from constructed networks  
299 because of the high degree of associations per *polB* OTU (Fig. 3A). One node connected to  
300 multiple edges was expected in the co-occurrence analysis. In previous NCLDV host  
301 prediction studies, additional processing was performed to filter the high dimensional  
302 associations to predict the meaningful interactions, such as weight cut-off or a combination of  
303 different co-occurrence network inference methods (18, 29). Moreover, no previous study  
304 quantitatively assessed the performance of co-occurrence networks when predicting NCLDV–  
305 host relationships. Qualitatively identifying known pairs and detecting HGT (without

306 validation) have been commonly used to assess prediction reliability (18, 28). Therefore, we  
307 aimed to 1) quantitatively assess the performance of co-occurrence-based host prediction for  
308 NCLDV and 2) improve the prediction results using filtering methods.

309 In a previous study of bacteriophage host prediction, ROC curves were used as an  
310 assessment metric to compare different prediction methods (39). However, the number of  
311 known virus–host pairs of NCLDV is not sufficient to generate a dataset for ROC  
312 assessment. Therefore, in this study, we carried out an alternative method, the LR+, to assess  
313 the performance. LR+ is calculated with two relative values, sensitivity and specificity (Fig.  
314 1). The LR+ of co-occurrence-based host predictions for positive associations was higher  
315 than 1 and increased along with increasing cut-off values for the edge weights (Fig. 4A),  
316 which demonstrated that positive prediction results were more likely to be true positives than  
317 those based on random prediction. In high-weight regions ( $> 0.6$  and  $> 0.4$ ), LR+ values were  
318 larger than 10 and 4, respectively. These LR+ values indicate that FlashWeave can increase  
319 the probability of predicting true positives (40). However, both the true positive rate  
320 (sensitivity,  $< 18.9\%$ ) and false positive rate ( $< 6.37\%$ ) were very low (Fig. S5C). These low  
321 rates were from FlashWeave with a cut-off of  $\alpha < 0.01$ , which excluded a large  
322 proportion of the *polB*–V9 pairs from the results. So only about 4000 predictions could be  
323 validated from a set of 6191 *polB*–V9 FlashWeave associations in this study (Fig. S5D, as  
324 described in the Materials and Methods). The FDR of co-occurrence was even higher than  
325 90% (Fig. S5A). Such a high FDR in co-occurrence networks demonstrates that condition  
326 positive connections (i.e., known interactions) are embedded in an immense pool of condition  
327 negative connections. However, these negative signals can correspond to either unidentified  
328 (i.e., currently unknown true interactions), indirect, or false relationships.

329 We also found that true positive predictions only existed in positive weight  
330 associations, whereas negative weight associations did not contribute to NCLDV–host  
331 detection (Fig. S5B). This result indicates that the abundance dynamics of NCLDV and their  
332 potential hosts were positively correlated with each other in the analyzed samples, which  
333 were collected at a global scale; this might be because NCLDV detected in the dataset were  
334 active viruses that replicate locally in their hosts. Similar results were obtained in other co-  
335 occurrence-based host prediction studies (28, 41). However, several experimental studies  
336 showed that the abundance dynamics of NCLDV and hosts showed a delay in time (30, 31).  
337 It is possible that the global-scale samples did not have sufficiently high resolution to detect  
338 negative correlations (or correlations with a time delay) due to lack of time-resolution (42).  
339 Therefore, further studies, especially those that focus on a high temporal resolution, are

340 needed to better understand the detailed dynamics of virus–host associations and the capacity  
341 of co-occurrence-based methods for host prediction.

342 The networks of different size fractions showed different performance patterns in  
343 predicting NCLDV–host relationships (Fig. 4B). This pattern is not dependent on the  
344 diversity of eukaryotic communities (Fig. S3A, B). Generally, small-sized fractions (0.8–5-  
345  $\mu\text{m}$  and 5–20- $\mu\text{m}$ ) networks performed better than large-sized fractions (20–180- $\mu\text{m}$  and 180-  
346 2000- $\mu\text{m}$ ) networks. This result is not dependent on the diversity of eukaryotic communities.  
347 To date, most of the known NCLDV hosts are small, such as the genera *Micromonas*,  
348 *Aureococcus*, and *Ostreococcus* are within the range of 0.8–5- $\mu\text{m}$ , and *Prymnesium*,  
349 *Heterosigma*, and *Heterocapsa* are within the range of 5–20- $\mu\text{m}$ . Because of this, our  
350 assessment method might be biased toward small size fractions as smaller organisms tend to  
351 be more abundant in the environment (43). However, it is also possible that NCLDV  
352 infections are more prevalent in smaller size fractions. Notably, the 0.8–inf- $\mu\text{m}$  size fraction  
353 network, which covered all four individual size fractions, performed best. This might be  
354 because NCLDVs can infect not only small hosts but also hosts from a broad size range.

355 Trimming of low-abundance OTUs was recommended to improve the prediction of  
356 true interactions and was often used in co-occurrence studies (44, 45). In our study, however,  
357 we did not achieve such performance improvement by treating input abundance data with a  
358 rigorous filtration (upper quartile) (Fig. S7). This result might be because the true positive  
359 and false positive rates defined in this study were too low; therefore, the validation may not  
360 be sufficiently sensitive to reflect the change between different abundance trimming  
361 strategies. However, it is also possible that low-abundance NCLDV OTUs are indeed  
362 network participants, as was demonstrated in a study showing that rare cyanobacterial species  
363 might play fundamental roles in blooming (46). Our result also revealed that FlashWeave-S  
364 was better than FlashWeave-HE at predicting NCLDV–host interactions (Fig. S7). The  
365 difference between FlashWeave-HE and FlashWeave-S is that HE mode can remove  
366 structural zeros during network inference. Structural zero is a typical property of  
367 heterogeneous datasets, like *Tara* Oceans datasets, and may lead to false-positive edges (47).  
368 Conversely, our results suggested that retaining structural zeros did not negatively influence  
369 the result, which indicates that the “presence–absence” pattern is as informative as the  
370 “more–less” pattern when identifying NCLDV–host relationships. This result is consistent  
371 with a previous “K-r-strategist” hypothesis: some NCLDVs, like mimiviruses, are K-  
372 strategists that decay slowly and can form stable associations with their hosts (48, 49). A  
373 recent report supported these non-“boom and bust” dynamics of prasinoviruses and their

374 hosts with an experiment-based mathematical model (50). Overall, our results support co-  
375 occurrence networks as a useful method for predicting NCLDV–host interactions in marine  
376 metagenomes, and likelihood ratios as useful quantitative metrics for assessing the  
377 performance of co-occurrence analysis for viral host predictions.

378 Although the results generated by FlashWeave already improved the accuracy of  
379 predictions, the condition positive interactions were still embedded in many noise edges, as  
380 shown by a very high FDR (Fig. S5A, S6B). To overcome this situation, we developed TIM  
381 to reduce the high dimension of associations and improve NCLDV host prediction (33). The  
382 results showed that NCLDVs had enriched connections with 15 major eukaryotic lineages,  
383 which included 24 taxonomic groups in three different ranks (order, class, and phylum)  
384 (Table S2) (Fig. 5A, S7). Using the LR+ as a prediction diagnostic metric, NCLDV host  
385 prediction improved 12-fold with TIM filtration (Fig. 5B). FDR dropped below 23% after  
386 TIM treatment (Fig. 5C). In TIM-enriched connections, some are known NCLDV–host pairs,  
387 such as *Phycodnaviridae* and Mamiellophyceae, *Mimiviridae* and Haptophyta, and  
388 *Iridoviridae* and Metazoa. Some other studies revealed that *Mimiviridae* could exclusively  
389 infect diverse putative hosts (24, 51). Our results support the assumption that *Mimiviridae* has  
390 connections with 13 eukaryotic lineages out of 15 total lineages. Among these lineages,  
391 *Mimiviridae* had the most numerous links to Metazoa. Some mimiviruses (namaoviruses) are  
392 known to infect freshwater sturgeon, *Acipenser fulvescens* (52). Metazoans are presumed to  
393 be susceptible to mimiviruses, because the choanoflagellates, a group of eukaryotes that is  
394 phylogenetically close to metazoans, were recently identified to be the host of a species of  
395 *Mimiviridae* (15). Moreover, the TIM result revealed that *Phycodnaviridae* is closely  
396 connected to Bacillariophyta, which consists of three NCBI taxonomic groups:  
397 Thalassiosphaerales, Cymbellales, and Bacillariophyceae. Thalassiosphaerales was shown to  
398 have many HGT candidates with a large range of NCLDVs, and Bacillariophyceae also has a  
399 significant HGT candidate with phaeoviruses (24). Although Dictyochophyceae itself has not  
400 been proven to be a phycodnavirus host, its sister group Pelagophyceae was experimentally  
401 identified as an AaV host (53). Additionally, it is interesting to note the connection between  
402 Metazoa (Calanoida) and *Iridoviridae*. Calanoida is an order of arthropods commonly found  
403 as zooplankton; most of the sizes are 500–2000  $\mu\text{m}$ . The viruses of the family *Iridoviridae*  
404 infect many Arthropod species, including insects and crustaceans (17).

405 Furthermore, we also inferred associations between virophages and NCLDVs. To  
406 date, all isolated virophages are only known to infect *Mimiviridae* (54). As expected,  
407 *Mimiviridae* was the family with dominant connections to virophages (Fig. 6A). Recently, *in*

408 *silico* evidence demonstrated that virophages can infect *Phycodnaviridae*, which indicated  
409 that the virophage host range might be larger than we know (55). In support of this  
410 hypothesis, a relatively large number of virophage OTUs were found to be associated with  
411 *Phycodnaviridae* in our study. The enrichment analysis also revealed significant connections  
412 between three virophage clades and NCLDV families (Fig. 6B). To support the enrichment  
413 analysis, we conducted an HGT analysis because gene transfers have previously been found  
414 between Sputnik virophages and giant viruses (56). Our HGT analysis indicated a previously  
415 undescribed infectious relationship between virophage clade A and *Iridoviridae*. Overall, the  
416 results of virophage–NCLDV associations support our previous statement that co-occurrence  
417 networks inference and analysis are appropriate for investigating NCLDV interactions in  
418 marine metagenomic data.

419

## 420 **Materials and Methods**

### 421 **Metagenomic and metabarcoding data**

422 The microbial metagenomic and eukaryotic metabarcoding data used in this study  
423 were previously generated from plankton samples collected by the *Tara* Oceans expedition  
424 from 2008 to 2013 (57, 58). Because our research requires paired metagenomic and  
425 metabarcoding datasets, we used data derived from the euphotic zone samples, namely those  
426 from the surface (SRF) and Deep Chlorophyll Maximum (DCM) layers (59). Type B DNA  
427 polymerase (*polB*) was used as the marker gene for NCLDVs. A total of 6818 NCLDV *polB*  
428 OTUs were extracted from the metagenomic datasets (i.e., the second version of the Ocean  
429 Microbial Reference Gene Catalog, OM-RGC.v2) using the pplacer phylogenetic placement  
430 method (ML tree) (22, 60, 61). These *polB* sequences were classified into seven NCLDV  
431 families (*Mimiviridae*, *Phycodnaviridae*, *Marseilleviridae*, *Ascoviridae*, *Iridoviridae*,  
432 *Asfarviridae*, and *Poxviridae*) and two other giant virus groups (“*Medusaviridae*” and  
433 “*Pithoviridae*”). For eukaryotes, we employed used the metabarcoding data for eukaryotes,  
434 which targeting the 18S ribosomal RNA gene hypervariable V9 region (V9) (62). Taxonomic  
435 annotation of the eukaryotic metabarcoding data was previously performed by the *Tara*  
436 Oceans consortium using an extensive V9\_PR2 reference database (59), which was derived  
437 from the original Protist Ribosomal Reference (PR2) database (63). The diversity index of  
438 eukaryotic communities was calculated using the package “vegan” (64). Processed frequency  
439 data are available from GenomeNet  
440 (<ftp://ftp.genome.jp/pub/db/community/tara/Cooccurrence>).

441



## 442 **Data processing**

443 A relative abundance matrix for the NCLDV *polB* OTUs was extracted from OM-  
444 RGC.v2 for the samples derived from the pico-size fractions (0.22–1.6 or 0.22–3.0  $\mu\text{m}$ ). We  
445 converted the relative abundances of *polB* OTUs back to absolute read counts based on gene  
446 length and read length (assumed to be 100 nt). This process was required because small  
447 decimal numbers cannot be used by FlashWeave and because relative abundance data suffer  
448 from apparent correlations, which reduce the specificity of co-occurrence networks in  
449 revealing microbial interactions (44). To build comprehensive interaction networks involving  
450 eukaryotes of different sizes, we extracted the V9 read count matrices from the  
451 metabarcoding dataset for the following five size fractions: 0.8–5  $\mu\text{m}$ ; 5–20  $\mu\text{m}$  and 3–20  $\mu\text{m}$   
452 (hereafter referred to as “5–20  $\mu\text{m}$ ” for simplicity); 20–180  $\mu\text{m}$ ; 180–2000  $\mu\text{m}$ ; and > 0.8  $\mu\text{m}$   
453 (hereafter referred to as 0.8–inf  $\mu\text{m}$ ). To create the input files for network inference, the *polB*  
454 matrix was combined with each of the V9 matrices (corresponding to different size fractions),  
455 and only the samples represented by both *polB* and V9 files were placed in new files. In total,  
456 samples from 84 *Tara* Oceans stations (a total of 560 samples for two depths and five size  
457 fractions) widely distributed across oceans were used in this study (Fig. S1A). Depending on  
458 the individual size fractions, 84–127 samples were retained and included in the co-occurrence  
459 analysis (Fig. S1B). Read counts in the newly generated matrices were normalized using  
460 centered log-ratio (*clr*) transformation after adding a pseudo count of one to all matrix  
461 elements because zero cannot be transformed in *clr*. Following *clr* normalization, we filtered  
462 out low-abundance OTUs with a lower quartile (Q1) filtering approach. Specifically, OTUs  
463 were retained in the matrices when their *clr*-normalized abundance was higher than Q1  
464 (among the non-zero counts in the original count matrix prior to the addition of a pseudo  
465 count of one) in at least five samples. Normalization and filtering were separately applied to  
466 *polB* and V9. The numbers of OTUs in the final matrices are provided in Fig. S1C.

467

## 468 **Co-occurrence-based network inference**

469 Network inference was performed using FlashWeave [v0.15.0 (47)]. FlashWeave is a  
470 fast and compositionally robust tool for ecological network inference based on the local-to-  
471 global learning framework. Meta-variables (such as environmental parameters) can be  
472 included in the FlashWeave network to remove potential indirect associations. We used  
473 temperature, salinity, nitrate, phosphate, and silicate concentrations as meta-variables in our  
474 network inferences to determine their correlations with *polB* OTUs. FlashWeave provides a  
475 heterogeneous mode (FlashWeave-HE), which helps overcome sample heterogeneity.



476 However, FlashWeave-HE may not be appropriate for the *Tara* Oceans data because it was  
477 shown to predict an insufficient number of known planktonic interactions (47). Therefore, we  
478 mainly used FlashWeave-S with default settings except for the FlashWeave normalization  
479 step and comparison between FlashWeave-S and FlashWeave-HE. A threshold to determine  
480 the statistical significance was set to  $\alpha < 0.01$ . All detected pairwise associations were  
481 assigned a value called “weight” that ranged between  $-1$  and  $+1$ . Edges with weights  $> 0$  or  $<$   
482  $0$  were referred to as positive and negative associations, respectively. To compare the  
483 performance of FlashWeave-S to other co-occurrence methods, we used FlashWeave-HE,  
484 Spearman, and FastSpar (65). The FlashWeave-HE settings were the same as FlashWeave-S  
485 but with a command “heterogeneous”. For Spearman, we used `stats.spearmanr` in package  
486 “Scipy” (66). In FastSpar, we used 50 iterations, 20 excluded iterations, and a threshold of  
487  $0.1$  to generate associations. To reduce the high dimensionality of the datasets, upper quartile  
488 (Q3) filtered matrices were used for comparison among FlashWeave-S, Spearman, and  
489 FastSpar.

490

#### 491 **Network validation**

492 We validated the virus–host associations in inferred networks based on a confusion  
493 matrix defined by the known NCLDV–host information (Fig. 1). Briefly, we manually  
494 compiled 69 known virus–host relationships for NCLDVs (Table S4). In the validation  
495 process, eukaryotic taxonomic groups were annotated at the level of the “Major lineages” in  
496 the extensive PR2 database (updated after publication) (62). The “Major lineages” were used  
497 in the present study because 1) the deficiency of known virus–host relationships limited the  
498 use of lower eukaryotic taxonomy ranks, such as genus, for assessment, and 2) these lineages  
499 adequately represented marine eukaryotes by covering the full spectrum of cataloged  
500 eukaryotic V9 diversity at a comparable phylogenetic depth (62). Then, we performed  
501 BLASTp [2.10.1 (67)] searches from the *Tara* Oceans PolB sequences against the NCLDV  
502 reference database to define groups of metagenomic PolBs with a threshold of 65% sequence  
503 identity by retaining only the best hit for each environmental PolB sequence. This threshold  
504 was determined because, by using reference PolB sequences and RefSeq protein sequence  
505 databases, we found that 60–70% of sequence identity could distinguish whether the  
506 NCLDVs infected hosts of the same major lineages; this was mainly tested for  
507 *Phycodnaviridae* because of the lack of host information for closely related viruses in other  
508 NCLDV families (Table S5). Then, 65% was chosen because it could provide a better LR+  
509 (as described below) than 60% and 70%.

510 The positive likelihood ratio was used in for assessment to estimate the predictions  
511 accuracy. This approach is commonly used in diagnostic testing to assess if a test (host  
512 prediction in this study) usefully changes the probability of the existence of condition  
513 positive (true positive). In this study, the LR+ was used because host prediction is a test to  
514 discover condition positive states (68). LR+ is calculated by dividing the true-positive rate  
515 (sensitivity) by the false-positive rate (1 –specificity). If LR+ is close to 1, the performance of  
516 the prediction is comparable to a random prediction. If LR+ >> 1, a positive prediction result  
517 is more likely to be a true positive than that based on random prediction. From the set of  
518 detected associations between a given *polB* OTU and V9 OTUs that belong to a given major  
519 eukaryotic lineage, we only kept the best positive and negative associations (i.e., the edges  
520 with the highest absolute weights) to simplify the prediction scheme. As an auxiliary  
521 assessment, the FDR was also calculated by dividing the number of false positives by the  
522 number of positive predictions (Fig. 1). For the comparison among five size fractions, we  
523 only used the abundance in the overlap samples of 0.8–5  $\mu\text{m}$ , 5–20  $\mu\text{m}$ , 20–180  $\mu\text{m}$ , and  
524 180–2000  $\mu\text{m}$  sizes. So the number of samples in five size fractions is comparable (84, 88,  
525 88, 88, 88), which could reduce the bias that may influence the topology of networks (69).  
526

### 527 **Phylogeny-guided filtering of host predictions and its assessment**

528 We developed Taxon Interaction Mapper (TIM) to improve host predictions by co-  
529 occurrence approaches (33). TIM assumes that evolutionarily related viruses tend to infect  
530 evolutionarily related hosts (17, 70), and extract the most likely virus-host associations from  
531 the co-occurrence networks. TIM requires a phylogenetic tree of viruses (based on marker  
532 genes) and a set of connections between viruses and eukaryotes (co-occurrence edges), and  
533 then tests whether leaves (i.e., viral OTUs) under a node of the virus tree is enriched with a  
534 specific predicted host group compared with the rest of the tree using Fisher’s exact test and  
535 Benjamini–Hochberg adjustment (Fig. S9A) (33). TIM is available from  
536 <https://github.com/RomainBlancMathieu/TIM>.

537 We pooled network associations using FlashWeave analysis for five size fractions. To  
538 build a concise and credible viral phylogenetic tree, we removed all of the PolB sequences  
539 that were absent in the FlashWeave network associations, and the remaining sequences were  
540 filtered by the amino acid sequence length ( $\geq 500$  aa). Protein alignment was conducted using  
541 MAFFT-*linsi* [version 7.471 (71)], and 18 sequences were manually removed because they  
542 were not well aligned with other PolB sequences. A total of 501 PolB sequences were used to  
543 make a maximum likelihood phylogenetic tree with FastTree [version 2.1.11 (72)]. Then, the

544 PolB–V9 associations were mapped on the tree to calculate the significance of the enrichment  
545 of specific associations using TIM. TIM provides a list of nodes in the viral tree and  
546 associated NCBI taxonomies (order, class, and phylum) of eukaryotes that show significant  
547 enrichment in the leaves under the nodes. The TIM result was visualized with iTOL [version  
548 5 (73)]. The TIM result was converted to a network, in which nodes correspond to the major  
549 eukaryotic lineages. The network edge weight was defined by the number of tree nodes in  
550 each viral family subtree enriched with a specific major eukaryotic lineage. The network was  
551 visualized with Cytoscape [version 3.7.1] using prefuse force directed layout (74). To assess  
552 the effectiveness of TIM in improving prediction, we extracted all the associations predicted  
553 by TIM and compared their performance with the raw and weight cut-off results.

554

### 555 **Virophage–NCLDV associations**

556 We inferred the networks between NCLDVs and virophages using. *mcp* was used as  
557 the marker gene for virophages. First, 47 reference MCP amino acid sequences were  
558 collected from public databases and used to build an HMM profile. The HMM profile was  
559 used to search against the amino acid sequences of OM-RGC v2 using HMMER *hmmsearch*  
560 [version 3.3.1] with the threshold of E-value < 1E–90 (75). This threshold was determined by  
561 searching reference sequences against the GenomeNet nr-aa database. The search detected  
562 195 *Tara* Oceans virophage MCP sequences in the OM-RGC database. Together with 47  
563 reference MCPs, a phylogenetic tree of MCP amino acid sequences was built using MAFFT  
564 and FastTree.

565 We extracted the abundance profiles for the 195 MCP sequences from the pico-  
566 (0.22–1.6 or 0.22–3.0  $\mu\text{m}$ ) and femto-size (< 0.22  $\mu\text{m}$ ) fractions. We used samples from the  
567 SRF and DCM depths. PolB and MCP abundance profiles were merged into two matrices  
568 corresponding to the two virophage size fractions. Then, network inference was conducted  
569 using the FlashWeave default settings after Q1 filtration. In the MCP phylogenetic tree, three  
570 virophage clades contributed most of the NCLDV connections. Thus, an NCLDV enrichment  
571 analysis for the three clades was carried out using Fisher’s exact test, and the *p*-value was  
572 adjusted by the Benjamin–Hochberg method. This approach was the same as TIM, but we did  
573 not use the TIM software because the current version of TIM requires inputs of eukaryotic  
574 nodes with NCBI taxonomy annotations.

575 We used another approach, HGT, to predict the virophage-NCLDV interactions. First,  
576 we generated an NCLDV genome database, which includes 56 reference NCLDV genomes  
577 corresponding to our *polB* dataset and 2,074 metagenome-assembled genomes from a

578 previous study (24). A total of 827,548 coding sequences were included in this database.  
579 Then, 195 virophage MCPs from the metagenomic data were BLASTp searched against this  
580 database using an E-value cut-off of  $1E-10$  (with a minimum query coverage of 50% and a  
581 minimum sequence identity of 50%). If a virophage MCP obtained a hit in the NCLDV  
582 genome database with a lower E-value compared with hits in the MCP database (the hit to  
583 itself was removed), the hit in the NCLDV genome database was considered an HGT  
584 candidate.

585

## 586 **Acknowledgments**

587 This work was supported by JSPS/KAKENHI (Nos. 18H02279 and 19H05667 to H.O.  
588 and Nos. 19K15895 and 19H04263 to H.E.), Kyoto University Research Coordination Alliance  
589 (funding to H.E.), and the Collaborative Research Program of the Institute for Chemical  
590 Research, Kyoto University (Nos. 2019-30 and 2020-27). Computational time was provided  
591 by the SuperComputer System, Institute for Chemical Research, Kyoto University. We further  
592 thank the *Tara* Oceans consortium, and the people and sponsors who supported *Tara* Oceans.  
593 *Tara* Oceans (including both the *Tara* Oceans and *Tara* Oceans Polar Circle expeditions) would  
594 not exist without the leadership of the *Tara* Expeditions Foundation and the continuous support  
595 of 23 institutes (<https://oceans.taraexpeditions.org>). This article is contribution number XXX  
596 of *Tara* Oceans. We thank Mallory Eckstut, PhD, from Edanz Group ([https://en-author-](https://en-author-services.edanzgroup.com/ac)  
597 [services.edanzgroup.com/ac](https://en-author-services.edanzgroup.com/ac)) for editing a draft of this manuscript.

598

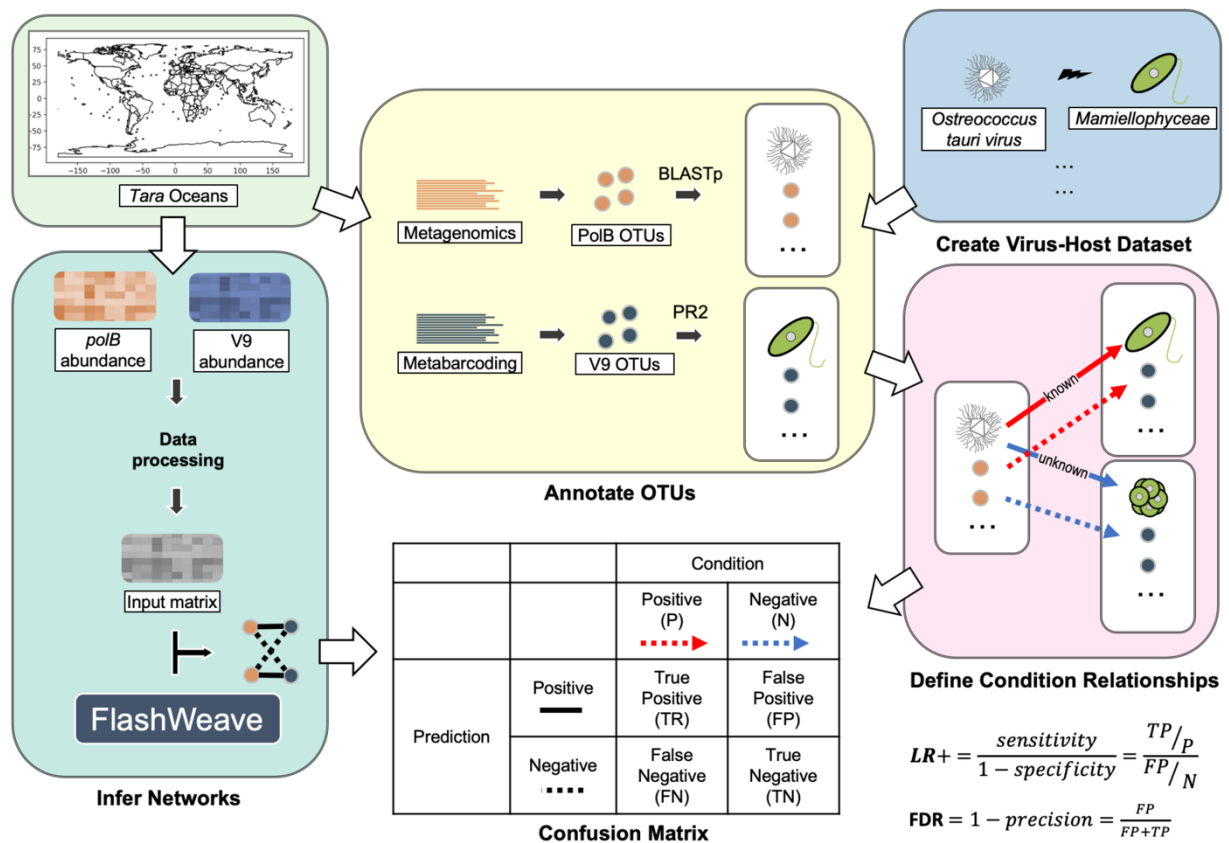

599  
600  
601  
602  
603  
604  
605  
606  
607  
608  
609  
610  
611  
612  
613  
614  
615

**Figure 1. Overall workflow for inferring co-occurrence networks and quantitative assessment.** This figure shows how the input data (*Tara Oceans* metagenomics and metabarcoding data) were used in this study. The definition of the confusion matrix for quantitative assessment is shown in the table. The LR+ and FDR equations are given at the lower right corner of the plot.

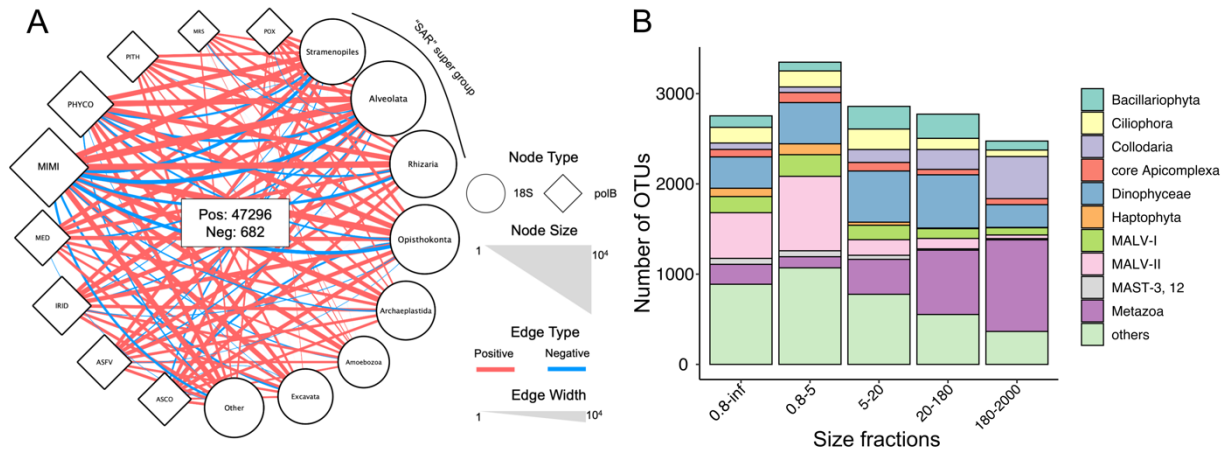

616  
617  
618  
619  
620  
621  
622  
623  
624  
625  
626  
627  
628  
629  
630  
631  
632  
633  
634

**Figure 2. *polB*-V9 co-occurrence network.** We performed co-occurrence analysis at the OTU level and constructed the network with pooled *polB*-V9 associations from five size fraction networks (A). To better display co-occurrence patterns, *polB* OTUs were grouped at the family or family-like level, and V9 OTUs were grouped using annotation at high taxonomic ranks. The size of each node indicates the number of OTUs that belong to the group, and the width of each edge indicates the number of associations between two connected groups. Associations with positive weight are shown in red and negative associations are shown in blue. (B) Number of associations connected to NCLDVs for each major eukaryotic lineage in five size fractions. The top 10 lineages were retained, and other lineages were omitted and shown as “others.” Size fractions are presented in  $\mu\text{m}$ .



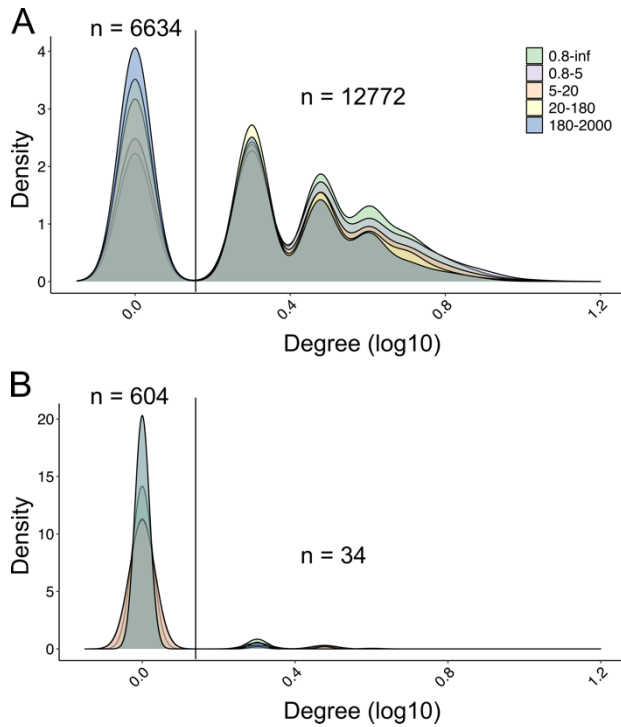

635  
636  
637  
638  
639  
640  
641  
642  
643  
644  
645  
646  
647  
648  
649  
650  
651  
652  
653

**Figure 3. Density plots for the degree of NCLDV nodes in co-occurrence networks.** The degree of an NCLDV node is given by the associations between this node and eukaryotes in the networks. The amount of NCLDV nodes are given on the top of the density values. (A) Positive degree (number of positive associations per node) for NCLDV nodes in five size fraction networks. (B) Negative degree (number of negative associations per node) for NCLDV nodes in five size fraction networks. Size fractions are presented in  $\mu\text{m}$ . NCLDV nodes with degree = 1 and degree > 1 are separated using a vertical line, and the number of nodes is given.

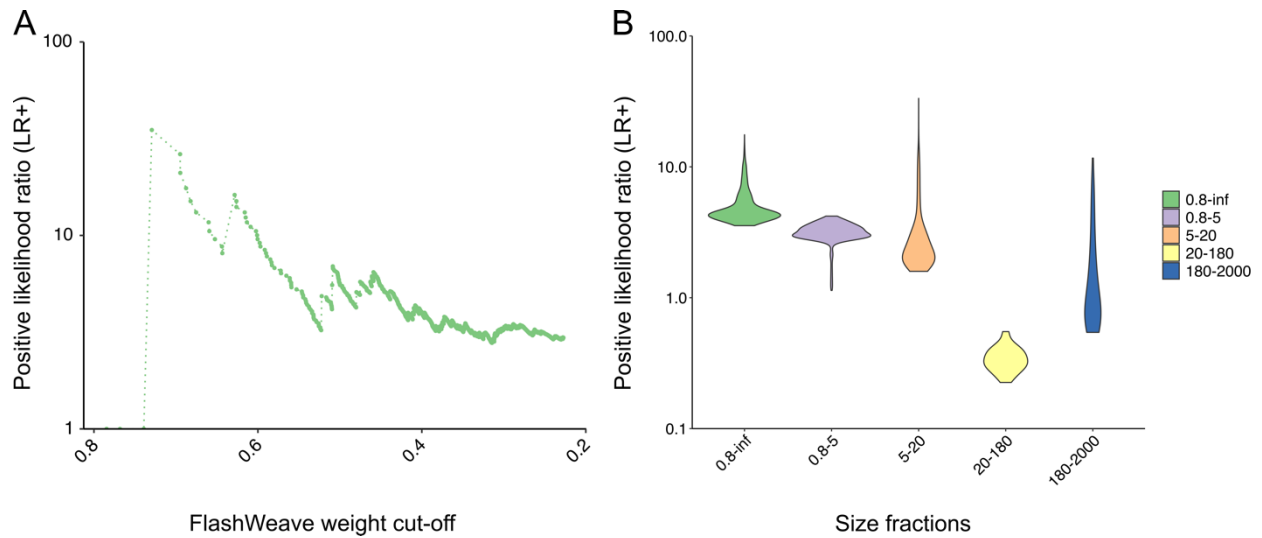

654  
655  
656  
657  
658  
659  
660  
661  
662  
663  
664  
665  
666  
667  
668  
669  
670  
671  
672  
673  
674  
675  
676  
677

**Figure 4. Positive likelihood ratios (LR+) in the NCLDV virus–host validation.** (A) General performance of co-occurrence networks is shown with the LR+ calculated with associations pooled from five size fractions networks. To show the relationship between LR+ and FlashWeave association weight, the LR+ values are plotted along with the association weight. (B) Performance of each size fraction network is shown with the violin plot by ggplot2 with a bandwidth of 2. Size fractions are presented in  $\mu\text{m}$ .

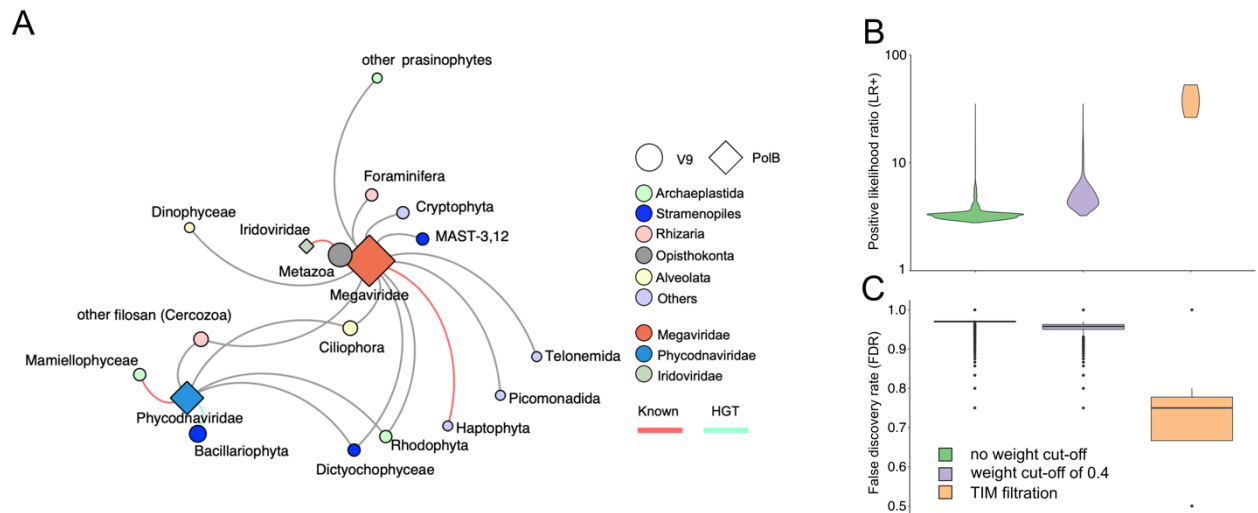

678  
679  
680  
681  
682  
683  
684  
685  
686  
687  
688  
689  
690  
691  
692  
693

**Figure 5. Prediction of NCLDV virus–host relationships with TIM.** (A) Undirected network that shows the relationships between NCLDVs and eukaryotes after TIM filtration. The size of each node indicates the number of predicted interactions of this group. The weight of network edges as defined by the number of tree nodes enriched in each viral family subtree to specific eukaryotic major lineages in the TIM analysis. Known virus–host relationships are highlighted in red, and the pairs found to have horizontal gene transfer are highlighted in yellow (1). (B) Performance of networks on NCLDV host prediction for original FlashWeave results without a weight cut-off, weight cut-off > 0.4, and TIM filtration, plotted by ggplot2 with a bandwidth of 2. (C) FDR of networks for NCLDV host prediction with the original FlashWeave results without a weight cut-off, weight cut-off > 0.4, and TIM filtration.

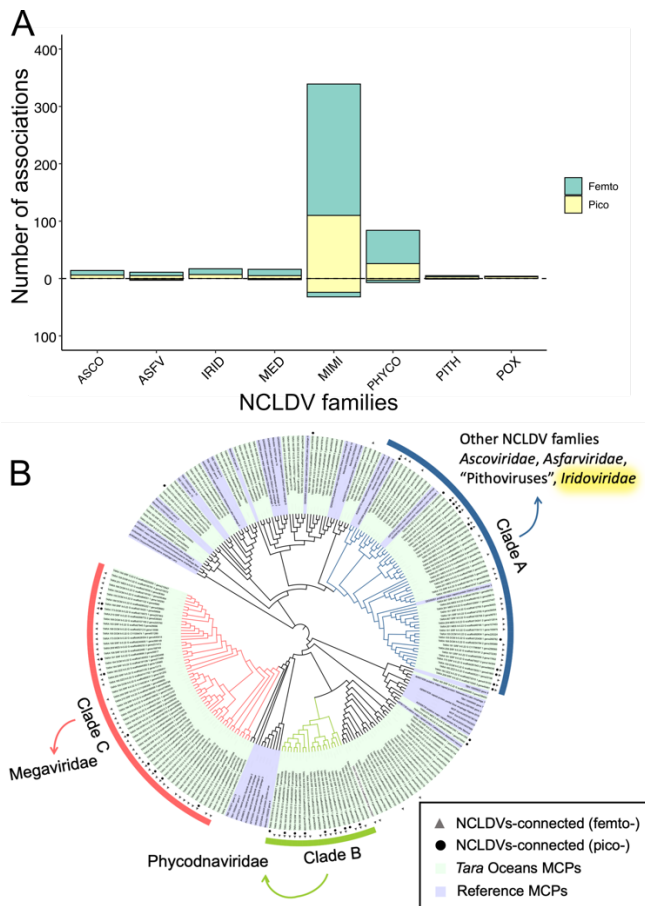

694  
695  
696  
697

698 **Figure 6. Associations between virophages and NCLDVs.** (A) Number of associations  
699 with virophages is shown for seven NCLDV families and two unclassified groups,  
700 “Medusaviruses” and “Pithoviruses.” Associations in the femto-size fraction network are  
701 shown in yellow, and in the pico-size fraction network are shown in green. The number of  
702 positive associations is above the zero axis, and the number of negative associations is below  
703 the zero axis. (B) Phylogenetic tree was constructed from 195 environmental virophages and  
704 47 reference MCP sequences. The outside layer indicates three major virophage clades. The  
705 inner two layers indicate that the virophage OTUs have at least one association with  
706 NCLDVs in femto- or pico-size fractions networks.

707

## 708 References

- 709 1. Colson P, De Lamballerie X, Yutin N, Asgari S, Bigot Y, Bideshi DK, Cheng XW,  
710 Federici BA, Van Etten JL, Koonin E V., La Scola B, Raoult D. 2013. “Megavirales”,  
711 a proposed new order for eukaryotic nucleocytoplasmic large DNA viruses. *Arch Virol*  
712 158:2517–2521.
- 713 2. Koonin E V., Dolja V V., Krupovic M, Varsani A, Wolf YI, Yutin N, Zerbini FM,  
714 Kuhn JH. 2020. Global Organization and Proposed Megataxonomy of the Virus  
715 World. *Microbiol Mol Biol Rev* 84:e00061-19.

- 716 3. Koonin E V., Yutin N. 2019. Evolution of the Large Nucleocytoplasmic DNA Viruses  
717 of Eukaryotes and Convergent Origins of Viral Gigantism. *Advances in Virus*  
718 *Research* 103:167-202.
- 719 4. Legendre M, Alempic JM, Philippe N, Lartigue A, Jeudy S, Poirot O, Ta NT, Nin S,  
720 Couté Y, Abergel C, Claverie JM. 2019. Pandoravirus celtis illustrates the  
721 microevolution processes at work in the giant Pandoraviridae genomes. *Front*  
722 *Microbiol* 10:1–11.
- 723 5. Boratto PVM, Oliveira GP, Machado TB, Andrade ACSP, Baudoin J-P, Klose T,  
724 Schulz F, Azza S, Decloquement P, Chabrière E, Colson P, Levasseur A, La Scola B,  
725 Abrahão JS. 2020. Yaravirus: A novel 80-nm virus infecting *Acanthamoeba*  
726 *castellanii*. *Proc Natl Acad Sci* 117:16579–16586.
- 727 6. Yoshikawa G, Blanc-Mathieu R, Song C, Kayama Y, Mochizuki T, Murata K, Ogata  
728 H, Takemura M. 2019. Medusavirus, a Novel Large DNA Virus Discovered from Hot  
729 Spring Water. *J Virol* 93:1–3.
- 730 7. Forterre P. 2011. Manipulation of cellular syntheses and the nature of viruses: The  
731 virocell concept. *Comptes Rendus Chim* 14:392–399.
- 732 8. Mougari S, Sahmi-Bounsiar D, Levasseur A, Colson P, Scola B La. 2019. Virophages  
733 of giant viruses: An update at eleven. *Viruses* 11:1–28.
- 734 9. Koonin E V., Yutin N. 2010. Origin and evolution of eukaryotic large nucleo-  
735 cytoplasmic DNA viruses. *Intervirology* 53:284–292.
- 736 10. La Scola B, Audic S, Robert C, Jungang L, De Lamballerie X, Drancourt M, Birtles R,  
737 Claverie JM, Raoult D. 2003. A giant virus in amoebae. *Science* 299:2033.
- 738 11. Nagasaki K, Yamaguchi M. 1997. Isolation of a virus infectious to the harmful bloom  
739 causing microalga *Heterosigma akashiwo* (Raphidophyceae). *Aquat Microb Ecol*  
740 13:135–140.
- 741 12. Moniruzzaman M, LeCleir GR, Brown CM, Gobler CJ, Bidle KD, Wilson WH,  
742 Wilhelm SW. 2014. Genome of brown tide virus (AaV), the little giant of the  
743 Megaviridae, elucidates NCLDV genome expansion and host-virus coevolution.  
744 *Virology* 466–467:60–70.
- 745 13. Wilson WH, Schroeder DC, Allen MJ, Holden MTG, Parkhill J, Barrell BG, Churcher  
746 C, Hamlin N, Mungall K, Norbertczak H, Quail MA, Price C, Rabinowitsch E,  
747 Walker D, Craighon M, Roy D, Ghazal P. 2005. Complete genome sequence and lytic  
748 phase transcription profile of a Coccolithovirus. *Science* 309:1090–1092.
- 749 14. Colson P, Gimenez G, Boyer M, Fournous G, Raoult D. 2011. The giant Cafeteria

- 750 roenbergensis virus that infects a widespread marine phagocytic protist is a new  
751 member of the fourth domain of life. *PLoS One* 6:13–17.
- 752 15. Needham DM, Yoshizawa S, Hosaka T, Poirier C, Choi CJ, Hehenberger E, Irwin  
753 NAT, Wilken S, Yung CM, Bachy C, Kurihara R, Nakajima Y, Kojima K, Kimura-  
754 Someya T, Leonard G, Malmstrom RR, Mende DR, Olson DK, Sudo Y, Sudek S,  
755 Richards TA, DeLong EF, Keeling PJ, Santoro AE, Shirouzu M, Iwasaki W, Worden  
756 AZ. 2019. A distinct lineage of giant viruses brings a rhodopsin photosystem to  
757 unicellular marine predators. *Proc Natl Acad Sci U S A* 116:20574–20583.
- 758 16. Williams T. 2008. Natural Invertebrate Hosts of Iridoviruses ( Iridoviridae ). *Neotrop*  
759 *Entomol* 37:615–632.
- 760 17. Mihara T, Nishimura Y, Shimizu Y, Nishiyama H, Yoshikawa G, Uehara H, Hingamp  
761 P, Goto S, Ogata H. 2016. Linking virus genomes with host taxonomy. *Viruses* 8:10–  
762 15.
- 763 18. Hingamp P, Grimsley N, Acinas SG, Clerissi C, Subirana L, Poulain J, Ferrera I,  
764 Sarmiento H, Villar E, Lima-Mendez G, Faust K, Sunagawa S, Claverie JM, Moreau  
765 H, Desdevises Y, Bork P, Raes J, De Vargas C, Karsenti E, Kandels-Lewis S, Jaillon  
766 O, Not F, Pesant S, Wincker P, Ogata H. 2013. Exploring nucleo-cytoplasmic large  
767 DNA viruses in Tara Oceans microbial metagenomes. *ISME J* 7:1678–1695.
- 768 19. Monier A, Claverie JM, Ogata H. 2008. Taxonomic distribution of large DNA viruses  
769 in the sea. *Genome Biol* 9:R106.
- 770 20. Li Y, Hingamp P, Watai H, Endo H, Yoshida T, Ogata H. 2018. Degenerate PCR  
771 primers to reveal the diversity of giant viruses in coastal waters. *Viruses* 10:496.
- 772 21. Mihara T, Koyano H, Hingamp P, Grimsley N, Goto S, Ogata H. 2018. Taxon richness  
773 of “Megaviridae” exceeds those of bacteria and archaea in the ocean. *Microbes*  
774 *Environ* 33:162–171.
- 775 22. Endo H, Blanc-Mathieu R, Li Y, Salazar G, Henry N, Labadie K, de Vargas C,  
776 Sullivan MB, Bowler C, Wincker P, Karp-Boss L, Sunagawa S, Ogata H. 2020.  
777 Biogeography of marine giant viruses reveals their interplay with eukaryotes and  
778 ecological functions. *Nat Ecol Evol* <https://doi.org/10.1038/s41559-020-01288-w>.
- 779 23. Carradec Q, Pelletier E, Da Silva C, Alberti A, Seeleuthner Y, Blanc-Mathieu R,  
780 Lima-Mendez G, Rocha F, Tirichine L, Labadie K, Kirilovsky A, Bertrand A, Engelen  
781 S, Madoui MA, Méheust R, Poulain J, Romac S, Richter DJ, Yoshikawa G, Dimier C,  
782 Kandels-Lewis S, Picheral M, Searson S, Acinas SG, Boss E, Follows M, Gorsky G,  
783 Grimsley N, Karp-Boss L, Krzic U, Pesant S, Reynaud EG, Sardet C, Sieracki M,



- 784 Speich S, Stemmann L, Velayoudon D, Weissenbach J, Jaillon O, Aury JM, Karsenti  
785 E, Sullivan MB, Sunagawa S, Bork P, Not F, Hingamp P, Raes J, Guidi L, Ogata H,  
786 De Vargas C, Iudicone D, Bowler C, Wincker P. 2018. A global ocean atlas of  
787 eukaryotic genes. *Nat Commun* 9:373.
- 788 24. Schulz F, Roux S, Paez-Espino D, Jungbluth S, Walsh DA, Denev VJ, McMahon KD,  
789 Konstantinidis KT, Eloie-Fadrosh EA, Kyrpides NC, Woyke T. 2020. Giant virus  
790 diversity and host interactions through global metagenomics. *Nature* 578:432–436.
- 791 25. Gallot-Lavallée L, Blanc G. 2017. A glimpse of nucleo-cytoplasmic large DNA virus  
792 biodiversity through the eukaryotic genomics window. *Viruses* 9:17.
- 793 26. Guglielmini J, Woo AC, Krupovic M, Forterre P, Gaia M. 2019. Diversification of  
794 giant and large eukaryotic dsDNA viruses predated the origin of modern eukaryotes.  
795 *Proc Natl Acad Sci U S A* 116:19585–19592.
- 796 27. Cunha V Da, Gaia M, Ogata H, Jaillon O, Delmont TO, Forterre P. 2020. Giant  
797 viruses encode novel types of actins possibly related to the origin of eukaryotic actin:  
798 the viractins. [bioRxiv doi.org/10.1101/2020.06.16.150565](https://doi.org/10.1101/2020.06.16.150565).
- 799 28. Moniruzzaman M, Wurch LL, Alexander H, Dyhrman ST, Gobler CJ, Wilhelm SW.  
800 2017. Virus-host relationships of marine single-celled eukaryotes resolved from  
801 metatranscriptomics. *Nat Commun* 8:16054.
- 802 29. Roux S, Chan LK, Egan R, Malmstrom RR, McMahon KD, Sullivan MB. 2017.  
803 Ecogenomics of virophages and their giant virus hosts assessed through time series  
804 metagenomics. *Nat Commun* 8:858.
- 805 30. Tomaru Y, Katanozaka N, Nishida K, Shirai Y, Tarutani K, Yamaguchi M, Nagasaki  
806 K. 2004. Isolation and characterization of two distinct types of HcRNAV, a single-  
807 stranded RNA virus infecting the bivalve-killing microalga *Heterocapsa*  
808 *circularisquama*. *Aquat Microb Ecol* 34:207–218.
- 809 31. Martínez Martínez J, Schroeder DC, Larsen A, Bratbak G, Wilson WH. 2007.  
810 Molecular dynamics of *Emiliana huxleyi* and cooccurring viruses during two separate  
811 mesocosm studies. *Appl Environ Microbiol* 73:554–562.
- 812 32. Sunagawa S, Acinas SG, Bork P, Bowler C, Eveillard D, Gorsky G, Guidi L, Iudicone  
813 D, Karsenti E, Lombard F, Ogata H, Pesant S, Sullivan MB, Wincker P, de Vargas C.  
814 2020. Tara Oceans: towards global ocean ecosystems biology. *Nat Rev Microbiol*  
815 18:428–445.
- 816 33. Kaneko H, Blanc-Mathieu R, Endo H, Chaffron S, Delmont TO, Gaia M, Henry N,  
817 Hernández-Velázquez R, Nguyen CH, Mamitsuka H, Forterre P, Jaillon O, De Vargas

- 818 C, Sullivan MB, Suttle CA, Guidi L, Ogata H. 2019. Eukaryotic virus composition can  
819 predict the efficiency of carbon export in the global ocean. *bioRxiv*  
820 <https://doi.org/doi.org/10.1101/710228>.
- 821 34. Fischer MG. 2016. Giant viruses come of age. *Curr Opin Microbiol* 31:50–57.
- 822 35. Delaroque N, Wolf S, Muller DG, Knippers R. 2000. The brown algal virus EsV-1  
823 particle contains a putative hybrid histidine kinase. *Virology* 273:383–390.
- 824 36. Fitzgerald LA, Graves M V., Li X, Hartigan J, Pfitzner AJP, Hoffart E, Van Etten JL.  
825 2007. Sequence and annotation of the 288-kb ATCV-1 virus that infects an  
826 endosymbiotic chlorella strain of the heliozoon *Acanthocystis turfacea*. *Virology*  
827 362:350–361.
- 828 37. Clerissi C, Desdevises Y, Grimsley N. 2012. Prasinoviruses of the Marine Green Alga  
829 *Ostreococcus tauri* Are Mainly Species Specific. *J Virol* 86:4611–4619.
- 830 38. Bjorbækmo MFM, Evenstad A, Røsæg LL, Krabberød AK, Logares R. 2020. The  
831 planktonic protist interactome: where do we stand after a century of research? *ISME J*  
832 14:544–559.
- 833 39. Edwards RA, McNair K, Faust K, Raes J, Dutilh BE. 2016. Computational approaches  
834 to predict bacteriophage-host relationships. *FEMS Microbiol Rev* 40:258–272.
- 835 40. Salkić NN. 2008. Objective assessment of diagnostic tests validity : a short review for  
836 clinicians and other mortals . Part II. *Acta Med Acad* 39–42.
- 837 41. Coutinho FH, Silveira CB, Gregoracci GB, Thompson CC, Edwards RA, Brussaard  
838 CPD, Dutilh BE, Thompson FL. 2017. Marine viruses discovered via metagenomics  
839 shed light on viral strategies throughout the oceans. *Nat Commun* 8:1–12.
- 840 42. Martin-Platero AM, Cleary B, Kauffman K, Preheim SP, McGillicuddy DJ, Alm EJ,  
841 Polz MF. 2018. High resolution time series reveals cohesive but short-lived  
842 communities in coastal plankton. *Nat Commun* 9:266.
- 843 43. Huete-Ortega M, Cermeño P, Calvo-Díaz A, Marañón E. 2012. Isometric size-scaling  
844 of metabolic rate and the size abundance distribution of phytoplankton. *Proc R Soc B*  
845 *Biol Sci* 279:1815–1823.
- 846 44. Berry D, Widder S. 2014. Deciphering microbial interactions and detecting keystone  
847 species with co-occurrence networks. *Front Microbiol* 5:1–14.
- 848 45. Kurtz ZD, Müller CL, Miraldi ER, Littman DR, Blaser MJ, Bonneau RA. 2015. Sparse  
849 and Compositionally Robust Inference of Microbial Ecological Networks. *PLoS*  
850 *Comput Biol* 11:1–25.
- 851 46. Xue Y, Chen H, Yang JR, Liu M, Huang B, Yang J. 2018. Distinct patterns and

- 852 processes of abundant and rare eukaryotic plankton communities following a reservoir  
853 cyanobacterial bloom. *ISME J* 12:2263–2277.
- 854 47. Tackmann J, Matias Rodrigues JF, von Mering C. 2019. Rapid Inference of Direct  
855 Interactions in Large-Scale Ecological Networks from Heterogeneous Microbial  
856 Sequencing Data. *Cell Syst* 9:286-296.e8.
- 857 48. Suttle CA. 2007. Marine viruses - Major players in the global ecosystem. *Nat Rev*  
858 *Microbiol* 5:801–812.
- 859 49. Blanc-Mathieu R, Dahle H, Hofgaard A, David B, Kalinowski J, Ogata H, Sandaa R-  
860 A. 2020. The genome of a persistent giant algal virus encodes an unprecedented  
861 number of genes involved in energy metabolism. *bioRxiv*  
862 [doi.org/10.1101/2020.07.30.228163](https://doi.org/10.1101/2020.07.30.228163).
- 863 50. Yau S, Krasovec M, Felipe Benites L, Rombauts S, Groussin M, Vancaester E, Aury  
864 JM, Derelle E, Desdevises Y, Escande ML, Grimsley N, Guy J, Moreau H, Sanchez-  
865 Brosseau S, van de Peer Y, Vandepoele K, Gourbiere S, Piganeau G. 2020. Virus-host  
866 coexistence in phytoplankton through the genomic lens. *Sci Adv* 6:eaay2587.
- 867 51. Claverie JM, Grzela R, Lartigue A, Bernadac A, Nitsche S, Vacelet J, Ogata H,  
868 Abergel C. 2009. Mimivirus and Mimiviridae: Giant viruses with an increasing  
869 number of potential hosts, including corals and sponges. *J Invertebr Pathol* 101:172–  
870 180.
- 871 52. Clouthier SC, Vanwalleghem E, Copeland S, Klassen C, Hobbs G, Nielsen O,  
872 Anderson ED. 2013. A new species of nucleo-cytoplasmic large DNA virus (NCLDV)  
873 associated with mortalities in Manitoba lake sturgeon *Acipenser fulvescens*. *Dis Aquat*  
874 *Organ* 102:195–209.
- 875 53. Gastrich MD, Leigh-Bell JA, Gobler CJ, Anderson OR, Wilhelm SW, Bryan M. 2004.  
876 Viruses as potential regulators of regional brown tide blooms caused by the alga,  
877 *Aureococcus anophagefferens*. *Estuaries* 27:112–119.
- 878 54. Duponchel S, Fischer MG. 2019. Viva laidaviruses! five features of virophages that  
879 parasitize giant DNA viruses. *PLoS Pathog* 15:1–7.
- 880 55. Xu S, Zhou L, Liang X, Zhou Y, Chen H, Yan S, Wang Y. 2020. Novel Cell-Virus-  
881 Virophage Tripartite Infection Systems Discovered in the Freshwater Lake Dishui  
882 Lake in Shanghai, China. *J Virol* 94:e00149-20.
- 883 56. Sun S, La Scola B, Bowman VD, Ryan CM, Whitelegge JP, Raoult D, Rossmann MG.  
884 2010. Structural Studies of the Sputnik Virophage. *J Virol* 84:894–897.
- 885 57. Gregory AC, Zayed AA, Conceição-Neto N, Temperton B, Bolduc B, Alberti A,

- 886 Ardyna M, Arkhipova K, Carmichael M, Cruaud C, Dimier C, Domínguez-Huerta G,  
887 Ferland J, Kandels S, Liu Y, Marec C, Pesant S, Picheral M, Pisarev S, Poulain J,  
888 Tremblay JÉ, Vik D, Acinas SG, Babin M, Bork P, Boss E, Bowler C, Cochrane G, de  
889 Vargas C, Follows M, Gorsky G, Grimsley N, Guidi L, Hingamp P, Iudicone D,  
890 Jaillon O, Kandels-Lewis S, Karp-Boss L, Karsenti E, Not F, Ogata H, Poulton N,  
891 Raes J, Sardet C, Speich S, Stemmann L, Sullivan MB, Sunagawa S, Wincker P,  
892 Culley AI, Dutilh BE, Roux S. 2019. Marine DNA Viral Macro- and Microdiversity  
893 from Pole to Pole. *Cell* 177:1109-1123.e14.
- 894 58. Pesant S, Not F, Picheral M, Kandels-Lewis S, Le Bescot N, Gorsky G, Iudicone D,  
895 Karsenti E, Speich S, Trouble R, Dimier C, Searson S. 2015. Open science resources  
896 for the discovery and analysis of Tara Oceans data. *Sci Data* 2:150023.
- 897 59. de Vargas C, Audic S, Henry N, Decelle J, Mahé F, Logares R, Lara E, Berney C, Le  
898 Bescot N, Probert I, Carmichael M, Poulain J, Romac S, Colin S, Aury J-M, Bittner L,  
899 Chaffron S, Dunthorn M, Engelen S, Flegontova O, Guidi L, Horák A, Jaillon O,  
900 Lima-Mendez G, Lukeš J, Malviya S, Morard R, Mulot M, Scalco E, Siano R, Vincent  
901 F, Zingone A, Dimier C, Picheral M, Searson S, Kandels-Lewis S, Acinas SG, Bork P,  
902 Bowler C, Gorsky G, Grimsley N, Hingamp P, Iudicone D, Not F, Ogata H, Pesant S,  
903 Raes J, Sieracki ME, Speich S, Stemmann L, Sunagawa S, Weissenbach J, Wincker P,  
904 Karsenti E. 2015. Ocean plankton. Eukaryotic plankton diversity in the sunlit ocean.  
905 *Science* 348:1261605.
- 906 60. Sunagawa S, Coelho LP, Chaffron S, Kultima JR, Labadie K, Salazar G, Djahanschiri  
907 B, Zeller G, Mende DR, Alberti A, Cornejo-Castillo FM, Costea PI, Cruaud C,  
908 D'Ovidio F, Engelen S, Ferrera I, Gasol JM, Guidi L, Hildebrand F, Kokoszka F,  
909 Lepoivre C, Lima-Mendez G, Poulain J, Poulos BT, Royo-Llonch M, Sarmiento H,  
910 Vieira-Silva S, Dimier C, Picheral M, Searson S, Kandels-Lewis S, Boss E, Follows  
911 M, Karp-Boss L, Krzic U, Reynaud EG, Sardet C, Sieracki M, Velayoudon D, Bowler  
912 C, De Vargas C, Gorsky G, Grimsley N, Hingamp P, Iudicone D, Jaillon O, Not F,  
913 Ogata H, Pesant S, Speich S, Stemmann L, Sullivan MB, Weissenbach J, Wincker P,  
914 Karsenti E, Raes J, Acinas SG, Bork P. 2015. Ocean plankton. Structure and function  
915 of the global ocean microbiome. *Science* 348:1261359.
- 916 61. Matsen FA, Kodner RB, Armbrust EV. 2010. pplacer: linear time maximum-  
917 likelihood and Bayesian phylogenetic placement of sequences onto a fixed reference  
918 tree. *BMC Bioinformatics* 11:538.
- 919 62. De Vargas C, Engelen S, Hingamp P, Sieracki M, Vargas C, Audic S, Henry N,

- 920 Decelle J, Mahé F, Logares R, Lara E, Berney C, Bescot N, Probert I, Carmichael M,  
921 Poulain J, Romac S. 2015. Eukaryotic plankton diversity in the sunlit ocean. *Science*  
922 103:167–202.
- 923 63. Guillou L, Bachar D, Audic S, Bass D, Berney C, Bittner L, Boutte C, Burgaud G, De  
924 Vargas C, Decelle J, Del Campo J, Dolan JR, Dunthorn M, Edvardsen B, Holzmann  
925 M, Kooistra WHCF, Lara E, Le Bescot N, Logares R, Mahé F, Massana R, Montresor  
926 M, Morard R, Not F, Pawlowski J, Probert I, Sauvadet AL, Siano R, Stoeck T, Vaulot  
927 D, Zimmermann P, Christen R. 2013. The Protist Ribosomal Reference database  
928 (PR2): A catalog of unicellular eukaryote Small Sub-Unit rRNA sequences with  
929 curated taxonomy. *Nucleic Acids Res* 41:597–604.
- 930 64. Oksanen J, Kindt R, Legendre P, O’Hara B, Simpson GL, Solymos PM, Stevens  
931 MHH, & Wagner H. 2008. The vegan package. *Community Ecol Packag* 190.
- 932 65. Watts SC, Ritchie SC, Inouye M, Holt KE. 2019. FastSpar: Rapid and scalable  
933 correlation estimation for compositional data. *Bioinformatics* 35:1064–1066.
- 934 66. Virtanen P, Gommers R, Oliphant TE, Haberland M, Reddy T, Cournapeau D,  
935 Burovski E, Peterson P, Weckesser W, Bright J, van der Walt SJ, Brett M, Wilson J,  
936 Millman KJ, Mayorov N, Nelson ARJ, Jones E, Kern R, Larson E, Carey CJ, Polat İ,  
937 Feng Y, Moore EW, VanderPlas J, Laxalde D, Perktold J, Cimrman R, Henriksen I,  
938 Quintero EA, Harris CR, Archibald AM, Ribeiro AH, Pedregosa F, van Mulbregt P,  
939 Vijaykumar A, Bardelli A Pietro, Rothberg A, Hilboll A, Kloeckner A, Scopatz A, Lee  
940 A, Rokem A, Woods CN, Fulton C, Masson C, Häggström C, Fitzgerald C, Nicholson  
941 DA, Hagen DR, Pasechnik D V., Olivetti E, Martin E, Wieser E, Silva F, Lenders F,  
942 Wilhelm F, Young G, Price GA, Ingold GL, Allen GE, Lee GR, Audren H, Probst I,  
943 Dietrich JP, Silterra J, Webber JT, Slavič J, Nothman J, Buchner J, Kulick J,  
944 Schönberger JL, de Miranda Cardoso JV, Reimer J, Harrington J, Rodríguez JLC,  
945 Nunez-Iglesias J, Kuczynski J, Tritz K, Thoma M, Newville M, Kümmerer M,  
946 Bolingbroke M, Tartre M, Pak M, Smith NJ, Nowaczyk N, Shebanov N, Pavlyk O,  
947 Brodtkorb PA, Lee P, McGibbon RT, Feldbauer R, Lewis S, Tygier S, Sievert S,  
948 Vigna S, Peterson S, More S, Pudlik T, Oshima T, Pingel TJ, Robitaille TP, Spura T,  
949 Jones TR, Cera T, Leslie T, Zito T, Krauss T, Upadhyay U, Halchenko YO, Vázquez-  
950 Baeza Y. 2020. SciPy 1.0: fundamental algorithms for scientific computing in Python.  
951 *Nat Methods* 17:261–272.
- 952 67. Camacho C, Coulouris G, Avagyan V, Ma N, Papadopoulos J, Bealer K, Madden TL.  
953 2009. BLAST+: Architecture and applications. *BMC Bioinformatics* 10:1–9.

- 954 68. Yang WT, Parikh JR, Thomas Stavros A, Otto P, Maislin G. 2018. Exploring the  
955 negative likelihood ratio and how it can be used to minimize false-positives in breast  
956 imaging. *Am J Roentgenol* 210:301–306.
- 957 69. Faust K, Lima-Mendez G, Lerat JS, Sathirapongsasuti JF, Knight R, Huttenhower C,  
958 Lenaerts T, Raes J. 2015. Cross-biome comparison of microbial association networks.  
959 *Front Microbiol* 6:1–13.
- 960 70. Roux S, Adriaenssens EM, Dutilh BE, Koonin E V., Kropinski AM, Krupovic M,  
961 Kuhn JH, Lavigne R, Brister JR, Varsani A, Amid C, Aziz RK, Bordenstein SR, Bork  
962 P, Breitbart M, Cochrane GR, Daly RA, Desnues C, Duhaime MB, Emerson JB,  
963 Enault F, Fuhrman JA, Hingamp P, Hugenholtz P, Hurwitz BL, Ivanova NN, Labonté  
964 JM, Lee KB, Malmstrom RR, Martinez-Garcia M, Mizrachi IK, Ogata H, Páez-Espino  
965 D, Petit MA, Putonti C, Rattei T, Reyes A, Rodriguez-Valera F, Rosario K, Schriml L,  
966 Schulz F, Steward GF, Sullivan MB, Sunagawa S, Suttle CA, Temperton B, Tringe  
967 SG, Thurber RV, Webster NS, Whiteson KL, Wilhelm SW, Wommack KE, Woyke T,  
968 Wrighton KC, Yilmaz P, Yoshida T, Young MJ, Yutin N, Allen LZ, Kyrpides NC,  
969 Eloe-Fadrosh EA. 2019. Minimum information about an uncultivated virus genome  
970 (MIUVIG). *Nat Biotechnol* 37:29–37.
- 971 71. Katoh K, Misawa K, Kuma KI, Miyata T. 2002. MAFFT: A novel method for rapid  
972 multiple sequence alignment based on fast Fourier transform. *Nucleic Acids Res*  
973 30:3059–3066.
- 974 72. Price MN, Dehal PS, Arkin AP. 2009. Fasttree: Computing large minimum evolution  
975 trees with profiles instead of a distance matrix. *Mol Biol Evol* 26:1641–1650.
- 976 73. Letunic I, Bork P. 2019. Interactive Tree of Life (iTOL) v4: Recent updates and new  
977 developments. *Nucleic Acids Res* 47:256–259.
- 978 74. Paul Shannon, Andrew Markiel, Ozier O, Baliga NS, Wang JT, Ramage D, Amin N,  
979 Schwikowski B, Ideker T. 2003. Cytoscape: A Software Environment for Integrated  
980 Models. *Genome Res* 13:426.
- 981 75. Eddy SR. 1998. Profile hidden Markov models. *Bioinformatics* 14:755–763.

982

## 983 **Author contributions**

984 LM and HO designed the study. LM performed most of the bioinformatics analysis.  
985 HE generated the primary NCLDV data. RBM, SC, RHV, and HK contributed to the  
986 bioinformatics analysis. All authors contributed to the writing of the manuscript.

987



988 **Materials & Correspondence**

989           Correspondence and material requests should be addressed to HO (email:  
990 ogata@kuicr.kyoto-u.ac.jp).

991

992 **Competing financial interests**

993           The authors declare no competing financial interests.

994

995

996

997

998
